# Supplementary material for: Sepiolite/CNT/S@PANI composite with stable network structure for high performance lithium sulfur batteries
Source: Royal Society of Chemistry journal article supplement (doi:10.1039/c8ra01925h), 2018-01-01
Supplement: c8ra01925h1.pdf [file c8ra01925h1.pdf]

## Supplementary information

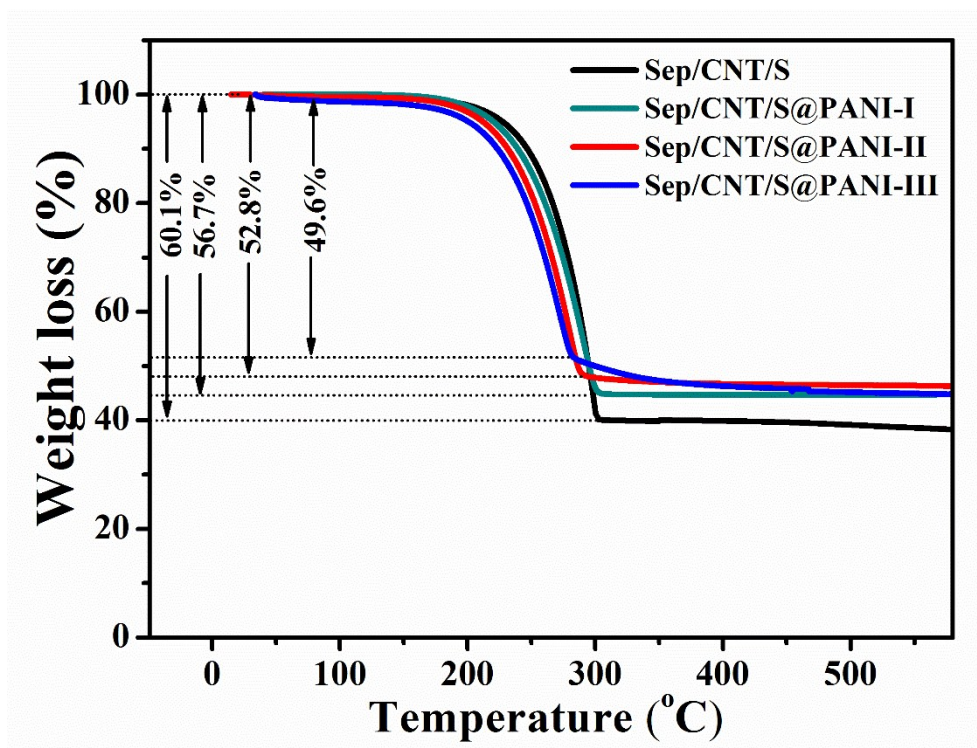

Fig. S1. Thermogravimetric curves of Sep/CNT/S composite and Sep/CNT/S@PANI-I, II and III composites.

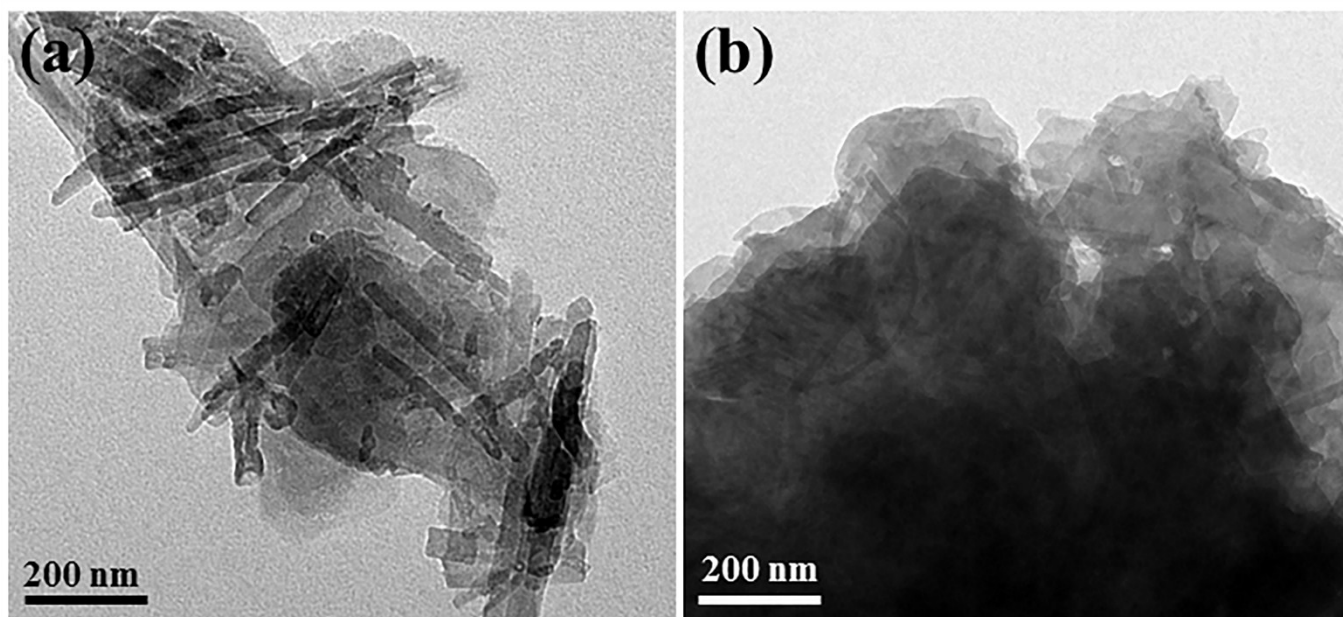

Fig. S2. TEM image of (a) Sep/CNT/S@PANI-I composite; (b) Sep/CNT/S@PANI-III composite.

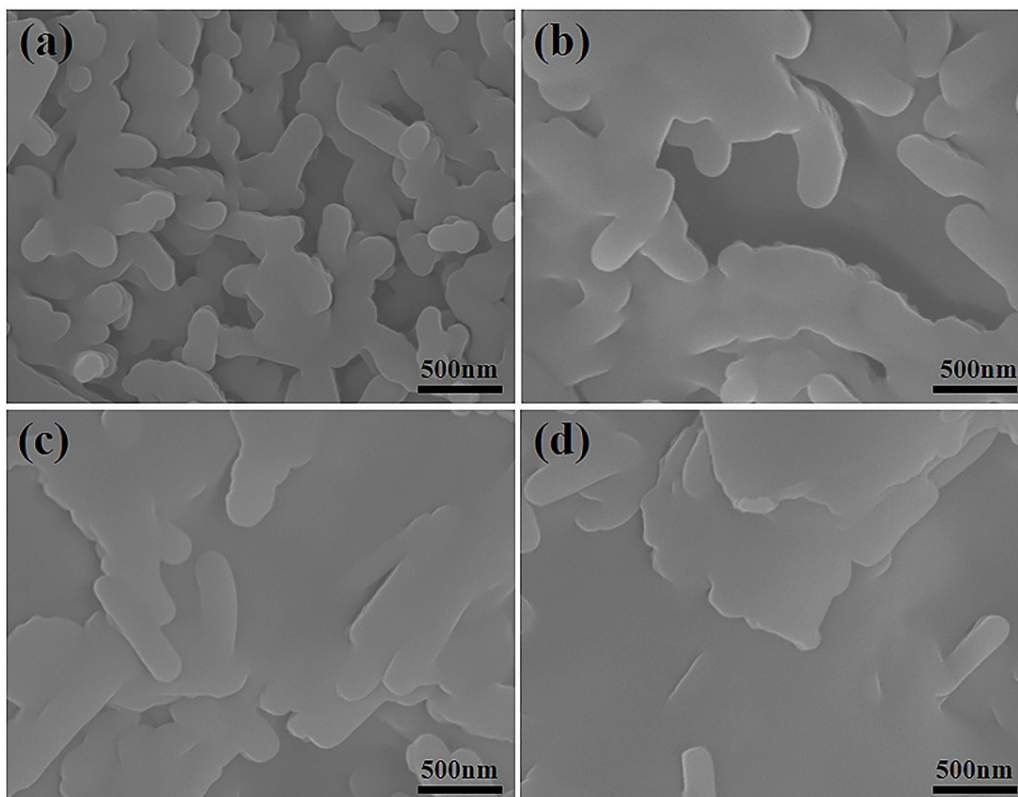

**Fig. S3.** SEM image of (a) Sep/CNT/S composite and (b) Sep/CNT/S@PANI-I, (c) Sep/CNT/S@PANI-II and (d) III.

**Table. S1.** Impedance data derived using the equivalent circuit model for Sep/CNT/S composite and Sep/CNT/S@PANI composites before cycle and after 300 cycles.

| <b>Before cycle</b>  | <b><math>R_e</math> (<math>\Omega</math>)</b> | <b><math>R_{ct}</math> (<math>\Omega</math>)</b> |
|----------------------|-----------------------------------------------|--------------------------------------------------|
| Sep/CNT/S            | 6.88                                          | 204.2                                            |
| Sep/CNT/S@PANI (4:1) | 6.71                                          | 166.2                                            |
| Sep/CNT/S@PANI (2:1) | 3.96                                          | 160.6                                            |
| Sep/CNT/S@PANI (1:1) | 4.89                                          | 148.7                                            |
| <b>After cycle</b>   | <b><math>R_e</math> (<math>\Omega</math>)</b> | <b><math>R_{ct}</math> (<math>\Omega</math>)</b> |
| Sep/CNT/S            | 4.91                                          | 89.8                                             |
| Sep/CNT/S@PANI (4:1) | 7.59                                          | 76.3                                             |
| Sep/CNT/S@PANI (2:1) | 7.81                                          | 39.4                                             |

---

|                      |      |      |
|----------------------|------|------|
| Sep/CNT/S@PANI (1:1) | 7.02 | 72.8 |
|----------------------|------|------|

---
